# Supplementary material
Source: PubMed Central journal article supplement (PMC11386838)
Supplement: PBI-18-415-s001.pdf [file PBI-18-415-s001.pdf]

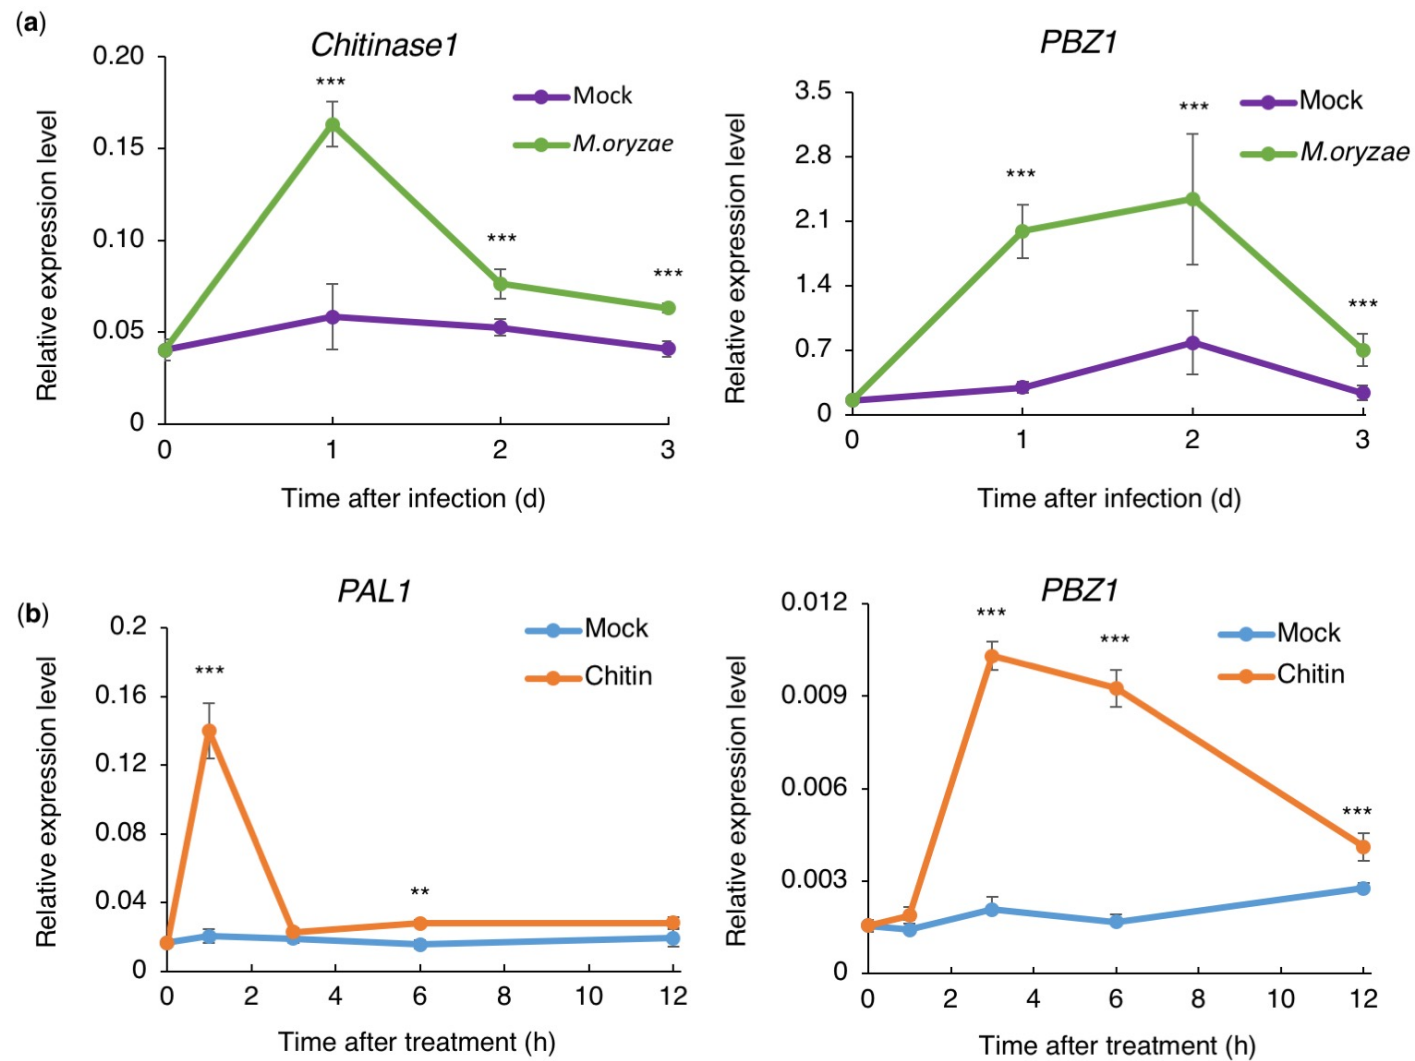

**Figure S1. Defence genes expression during fungus infection or chitin treatment.**

Expression of *Chitinase1* and *PBZ1* in rice plants infected with *M. oryzae* (a) and expression of *PAL1* and *PBZ1* in rice suspension cells treated with chitin (b) were quantified by qRT-PCR with three biological replicates. Error bars indicate S.E. Statistically significant differences between infected plants or treated suspension cells with mock controls are depicted with asterisks (\*,  $P < 0.05$ ; \*\*,  $P < 0.01$  and \*\*\*,  $P < 0.001$ ) according to the two-tailed *t*-test.

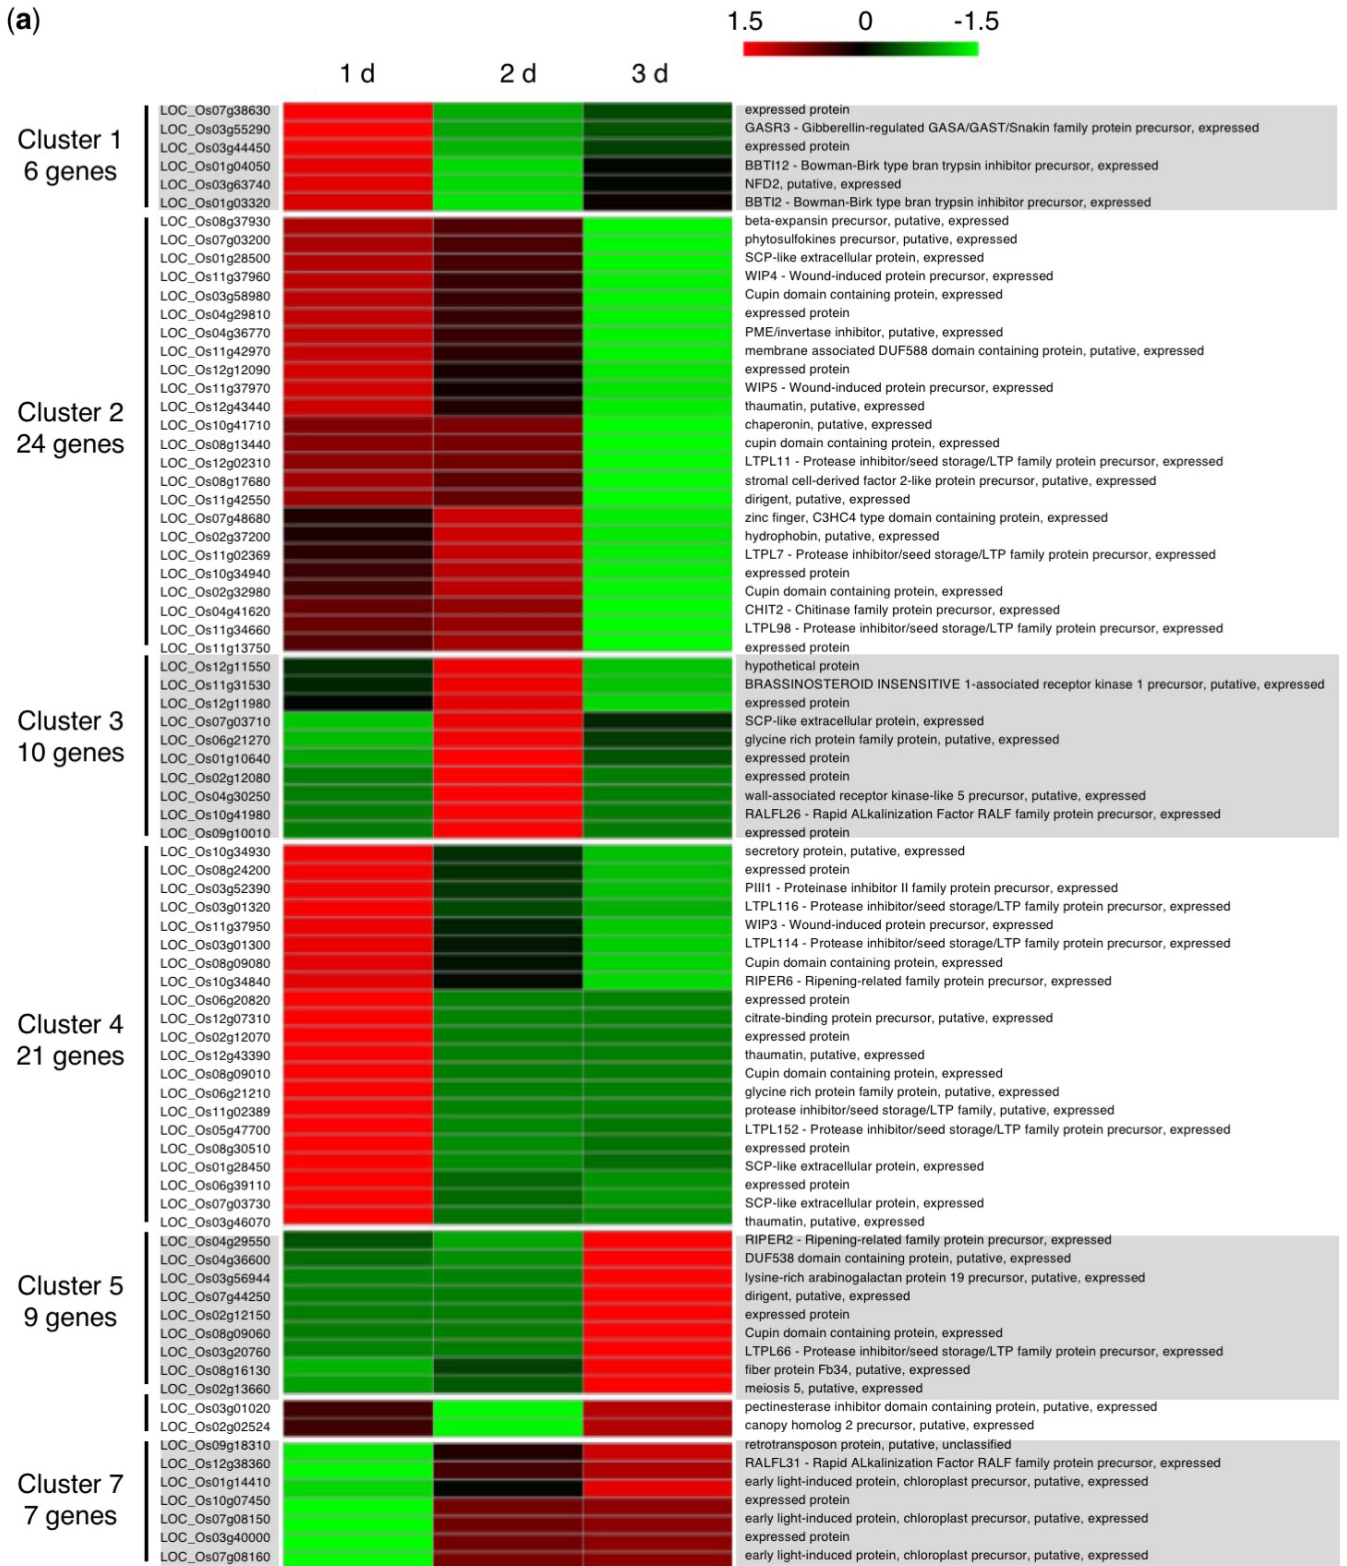

(b)

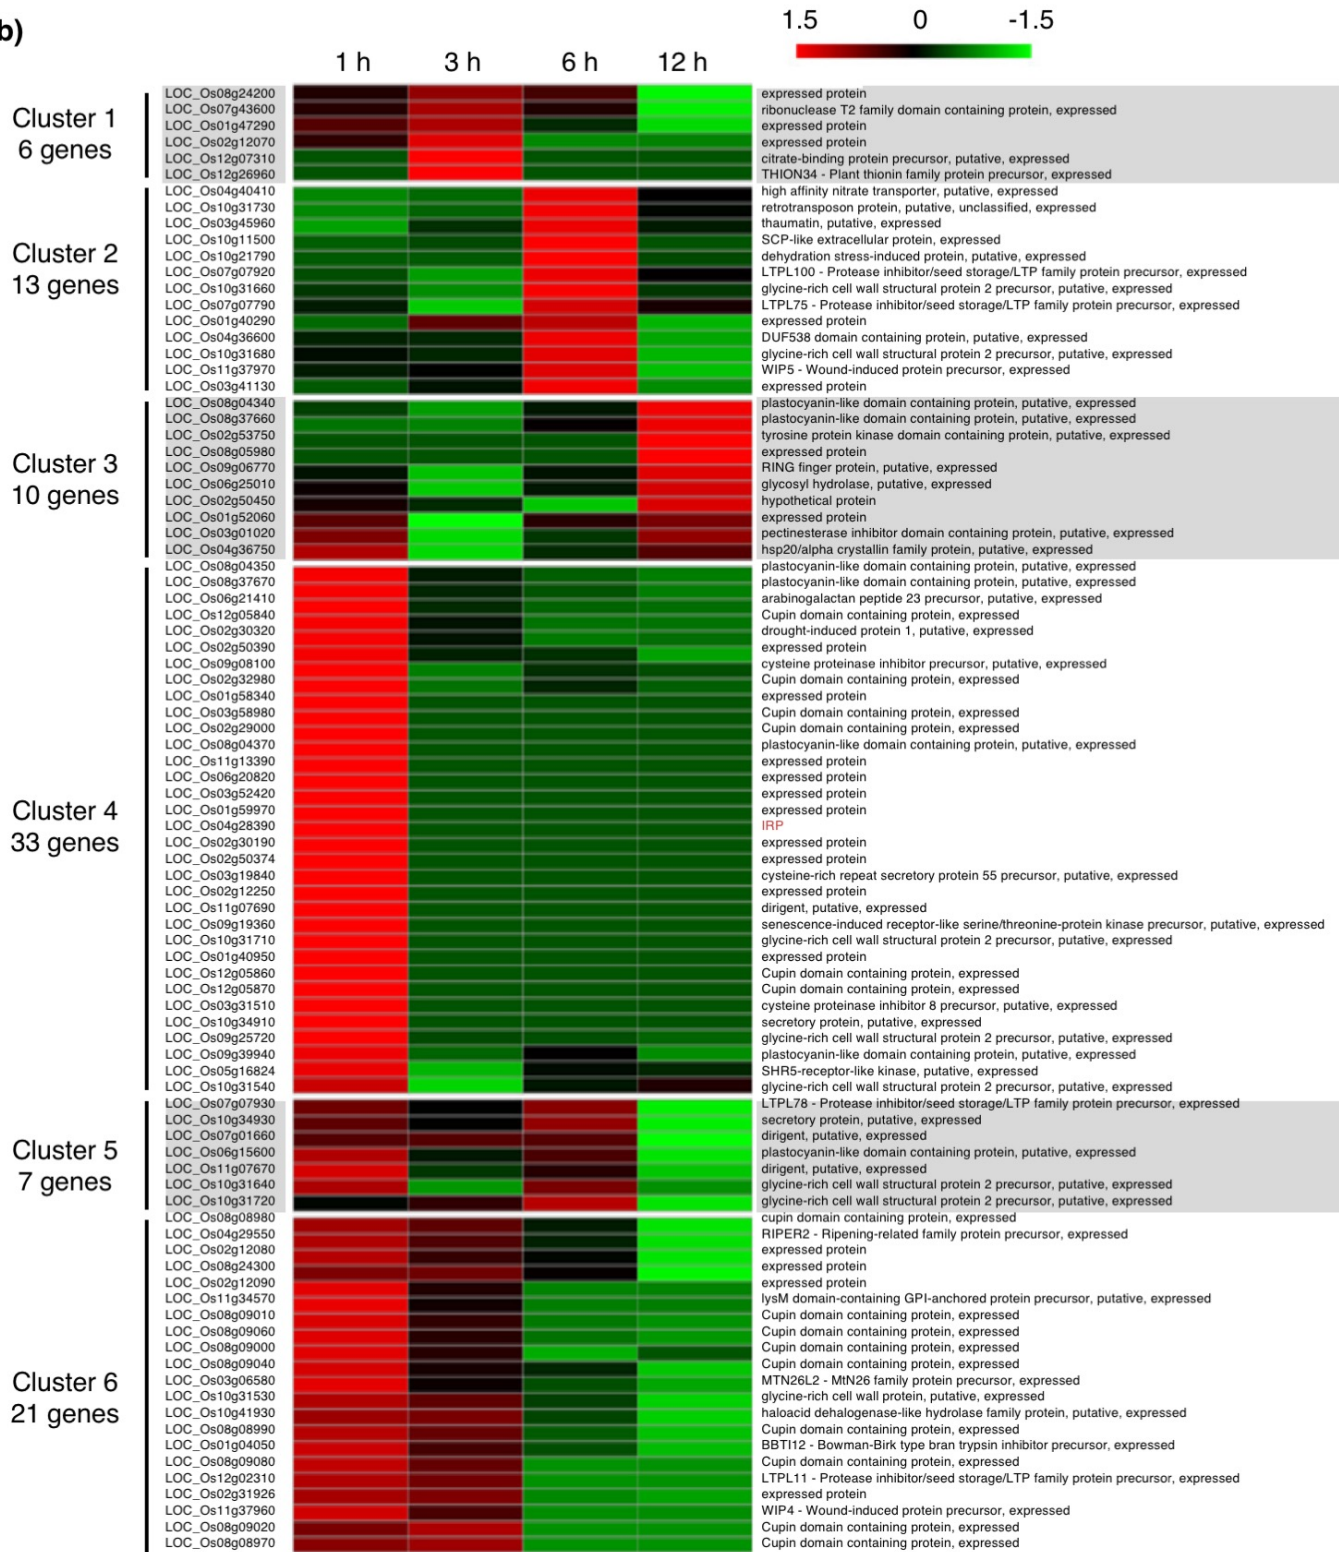

**Figure S2. Clustering analysis of the expression profiles of up-regulated SSP genes**

The *k*-means algorithm was used to cluster up-regulated SSP genes in plants (a) and suspension cells (b) using the Pearson correlation coefficient as the distance metric. The colour scale indicates the relative expression levels of SSP genes: red indicates higher expression, while green indicates lower expression.

(a)

|                         |     |                                        |                         |     |
|-------------------------|-----|----------------------------------------|-------------------------|-----|
| OsRALFL6 LOC_0s01g25540 | 1   | --MAKSLLAASALLLAL-LAVA-G-GA-----AAA    | GEVPL-AW-----ELGVGGGG   | 41  |
| OsRALFL7 LOC_0s01g25560 | 1   | MARPAI-VAAPALLLLAL-LIALATGGAD-----AAP  | GEVPL-SW-----ELGVV---   | 42  |
| OsRALFL8 LOC_0s02g44940 | 1   | MARAATVAAAASSALLLAL-LLALAWG-AA-----AG  | AGEVPL-GW-----ELGVGVGG  | 45  |
| AtRALF23 AT3G16570      | 1   | MRGLSRNSGAAAFAILLI LAVHNWSVAVSSQSTEFAG | DFFPFETECRGTIAECSVSAAL  | 60  |
| OsRALFL6 LOC_0s01g25540 | 42  | GGGEEDSF--GFSSDAAADGAAVVRRVLQGGQYISY   | GALRRDTPCSVRGASYNCRPG   | 99  |
| OsRALFL7 LOC_0s01g25560 | 43  | --GADDAF--GFPGEEAADSATAVVRRLQGGSYISY   | GALRRDTPCSVRGASYNCQPG   | 98  |
| OsRALFL8 LOC_0s02g44940 | 46  | SGDDDF--GFSG--AAADGAAVVRRVLQGRQYISY    | GALRRDTPCSVRGASYNCRPG   | 101 |
| AtRALF23 AT3G16570      | 61  | GDGDLFYGGGEMGE-EFEMDSEINRRILATRRYISY   | GALRRNTIPCSRREGASYNCRRG | 119 |
| OsRALFL6 LOC_0s01g25540 | 100 | GQANPYSRGCSAITRCRG-                    |                         | 117 |
| OsRALFL7 LOC_0s01g25560 | 99  | AEANPYSRGCSAITRCRG-                    |                         | 116 |
| OsRALFL8 LOC_0s02g44940 | 102 | GQANPYSRGCSAITRCRG-                    |                         | 119 |
| AtRALF23 AT3G16570      | 120 | AQANPYSRGCSAITRCRRS                    |                         | 138 |

(b)

0.05

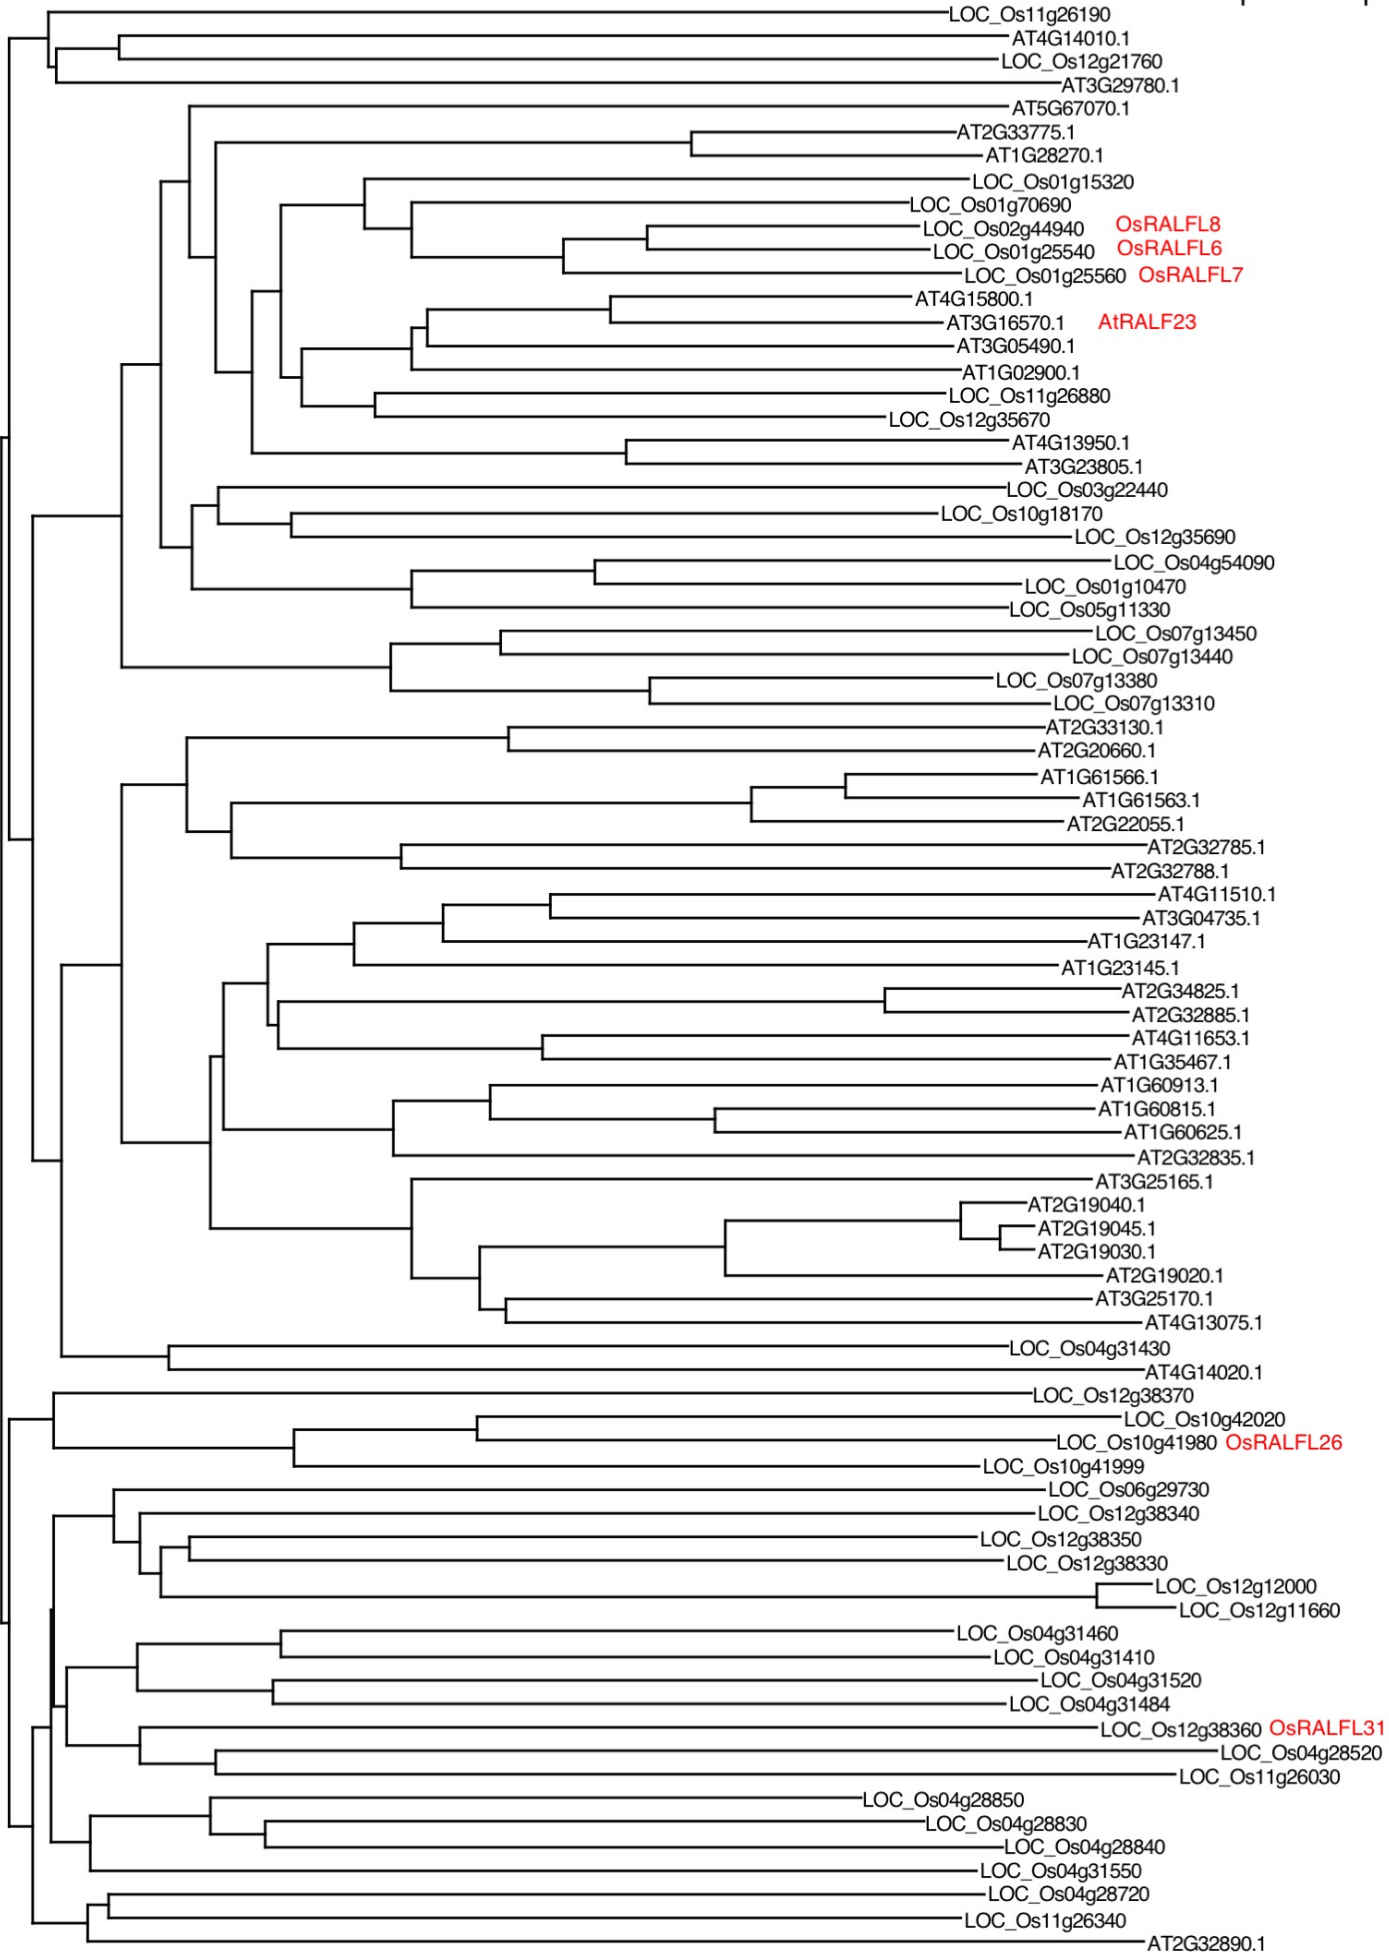

### **Figure S3. Phylogenetic analysis of RALFs in rice and *Arabidopsis*.**

Alignment of RALF proteins. Predicted N-terminal signal sequences are in a blue box, the RR motifs are in an orange box, and the YISY motifs are in a green box. Blue and grey arrowheads indicate the cleavage sites and the conserved cysteine residues, respectively. (b) Phylogenetic tree of RALFs in rice and *Arabidopsis*. Multiple sequence alignment and phylogenetic tree analysis were performed by Clustal Omega (<http://www.ebi.ac.uk/Tools/msa/clustalo/>), and the tree was drawn using NJplot (Mac: Ver. 2.3) using the neighbour-joining method.

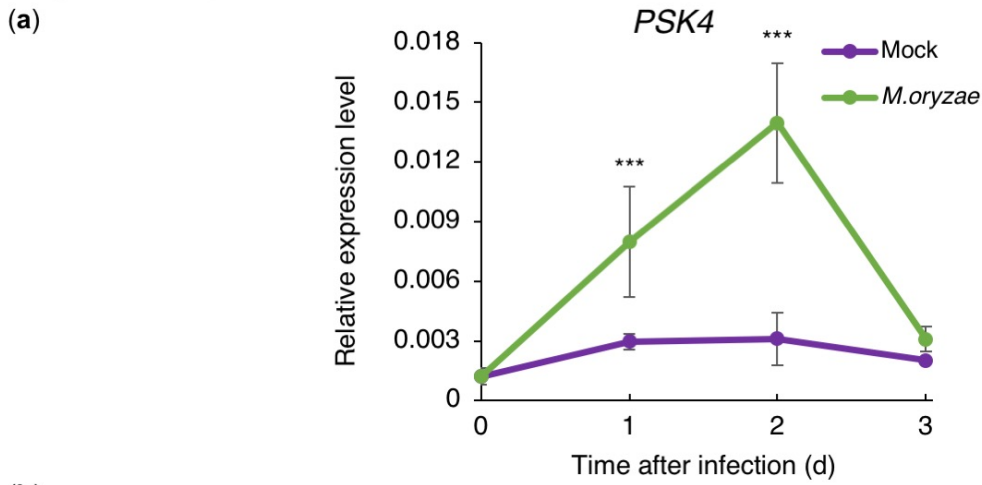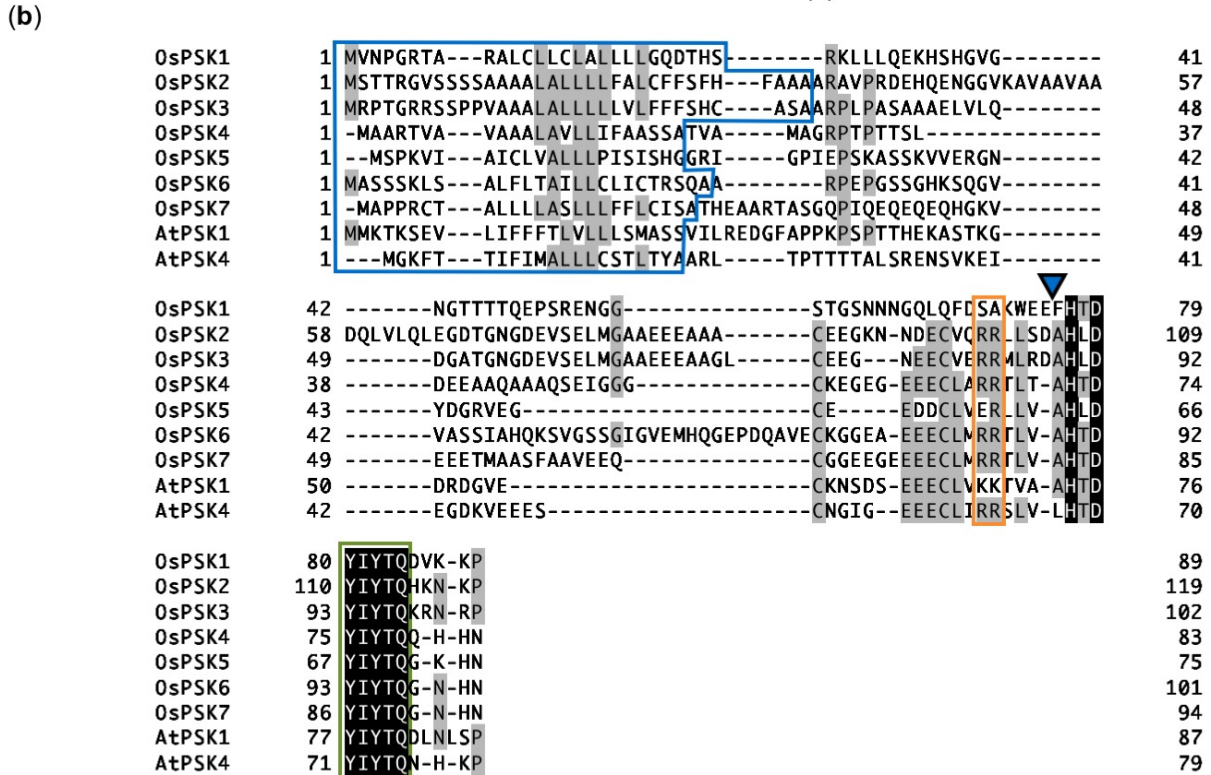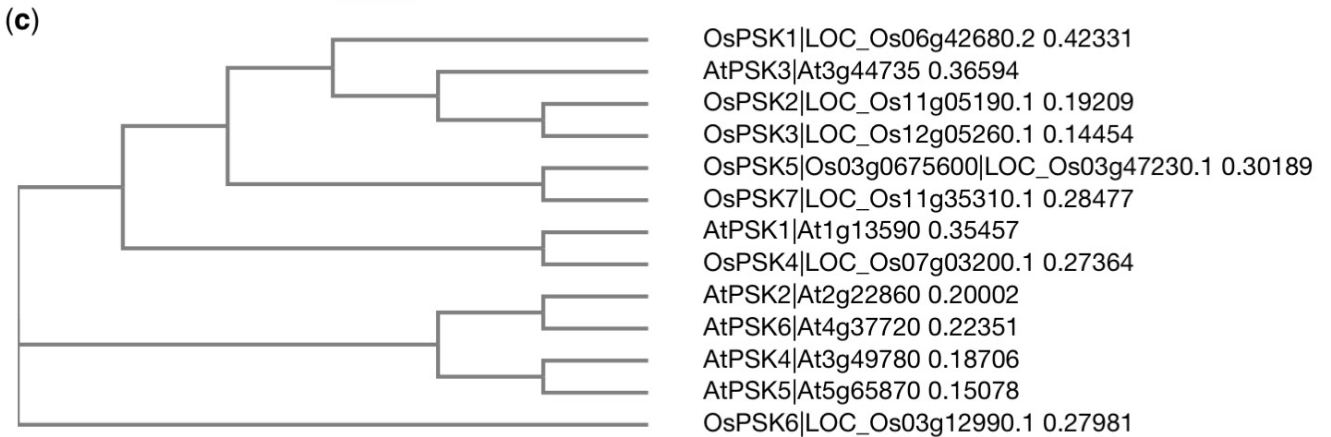

**Figure S4. Expression analysis of *OsPSK4* and phylogenetic analysis of PSKs in rice and *Arabidopsis*.**

(a) The *OsPSK4* expression in rice plants infected with *M. oryzae* was quantified by qRT-PCR. Error bars indicate S.E. Statistically significant differences between infected plants and mock control are depicted with asterisks (\*\*\*,  $P < 0.001$ ) according to the two-tailed *t*-test. (b) Protein alignment of PSKs. Predicted N-terminal signal sequences are in a blue box, the RR motifs are in an orange box, and the YIYTQ motifs are in a green box. A blue arrowhead indicates the putative cleavage site. (c) Phylogenetic trees of PSKs in rice and *Arabidopsis*. Multiple sequence alignments and phylogenetic construction using the neighbour-joining method without distance corrections were made by Clustal Omega.

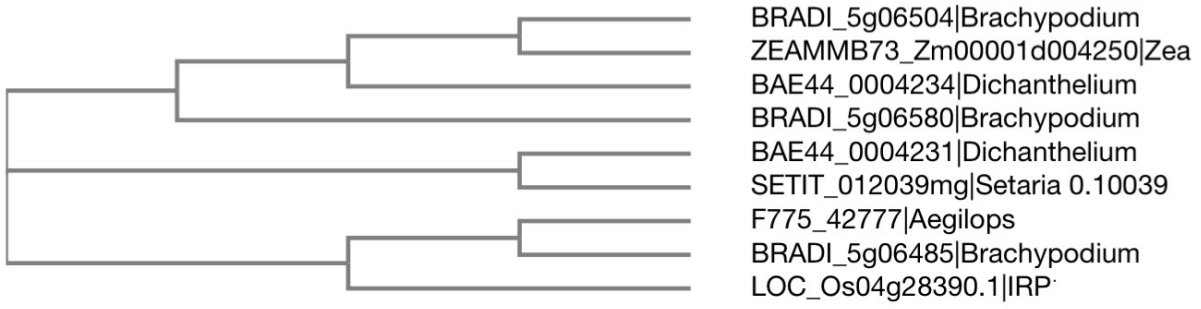

**Figure S5. Phylogenetic tree of IRP.**

Multiple sequence alignments and phylogenetic construction using the neighbour-joining method without distance corrections were made by Clustal Omega.



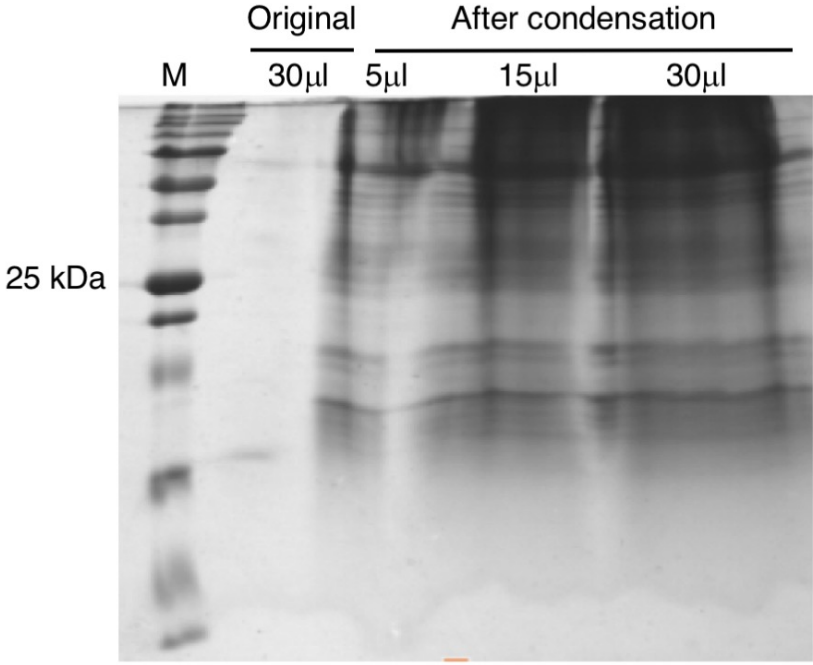

**Figure S6. SDS-PAGE analysis of protein in medium sample after anion-exchange chromatography and acetone precipitation**

(a)

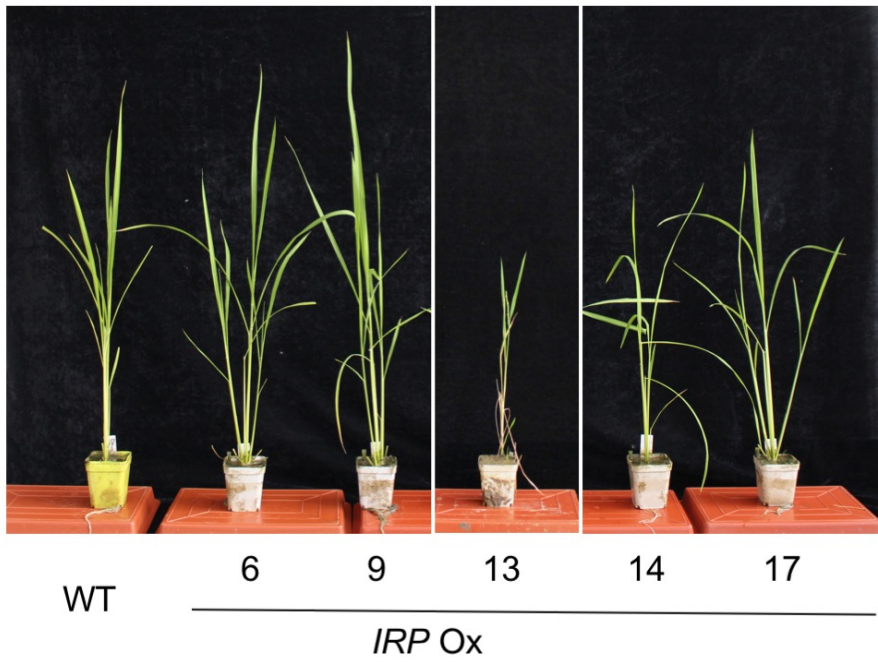

(b)

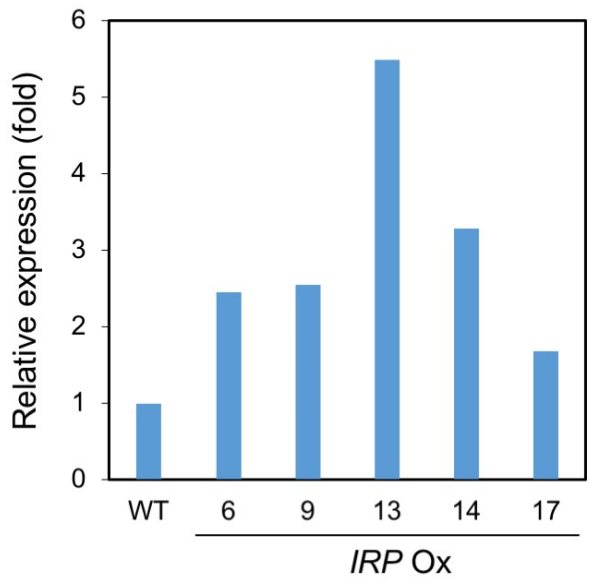

**Figure S7. Phenotype of plants overexpressing *IRP***

Phenotype of plants overexpressing *IRP*. (b) Expression level of *IRP* was quantified by qRT-PCR.

**Table S1. GO terms of upregulated genes overlapping in plants and suspension cells****P: Biological process, F: molecular function, C: cellular component.**The significant GOs ( $p$ -value < 0.01 ) were chosen.

|               | GO.ID               | Term                                      | Annotated | Significant | Expected | $p$ -value |
|---------------|---------------------|-------------------------------------------|-----------|-------------|----------|------------|
| BP            | 1 GO:0006468        | protein phosphorylation                   | 1546      | 50          | 10       | 6E-21      |
|               | 2 GO:0009607        | response to biotic stimulus               | 18        | 6           | 0.12     | 0.00000079 |
|               | 3 GO:0008152        | metabolic process                         | 9641      | 126         | 62.35    | 0.0000032  |
|               | 4 GO:0006032        | chitin catabolic process                  | 25        | 4           | 0.16     | 0.000019   |
|               | 5 GO:0016998        | cell wall macromolecule catabolic process | 43        | 4           | 0.28     | 0.00017    |
|               | 6 GO:0050832        | defense response to fungus                | 5         | 2           | 0.03     | 0.00041    |
|               | 7 GO:0042742        | defense response to bacterium             | 6         | 2           | 0.04     | 0.00061    |
|               | 8 GO:0006559        | L-phenylalanine catabolic process         | 8         | 2           | 0.05     | 0.00114    |
|               | 9 GO:0016567        | protein ubiquitination                    | 71        | 4           | 0.46     | 0.00118    |
|               | 10 GO:0006952       | defense response                          | 435       | 10          | 2.81     | 0.00693    |
| MF            | GO.ID               | Term                                      | Annotated | Significant | Expected | pva_wei    |
|               | 1 GO:0004713        | protein tyrosine kinase activity          | 1400      | 50          | 9.03     | 7.3E-23    |
|               | 2 GO:0004674        | protein serine/threonine kinase activity  | 1395      | 48          | 9        | 5.3E-20    |
|               | 3 GO:0005524        | ATP binding                               | 2973      | 67          | 19.18    | 1.3E-19    |
|               | 4 GO:0045735        | nutrient reservoir activity               | 78        | 7           | 0.5      | 0.00000077 |
|               | 5 GO:0005509        | calcium ion binding                       | 384       | 13          | 2.48     | 0.0000016  |
|               | 6 GO:0003824        | catalytic activity                        | 8998      | 134         | 58.04    | 0.0000025  |
|               | 7 GO:0004568        | chitinase activity                        | 25        | 4           | 0.16     | 0.000019   |
|               | 8 GO:0020037        | heme binding                              | 605       | 14          | 3.9      | 0.000046   |
|               | 9 GO:0030145        | manganese ion binding                     | 53        | 4           | 0.34     | 0.00039    |
|               | 10 GO:0005488       | binding                                   | 11431     | 149         | 73.73    | 0.00108    |
|               | 11 GO:0016841       | ammonia-lyase activity                    | 8         | 2           | 0.05     | 0.00113    |
|               | 12 GO:0004497       | monooxygenase activity                    | 413       | 9           | 2.66     | 0.00157    |
|               | 13 GO:0004842       | ubiquitin-protein transferase activity    | 82        | 4           | 0.53     | 0.002      |
|               | 14 GO:0043169       | cation binding                            | 3127      | 36          | 20.17    | 0.0022     |
|               | 15 GO:0016211       | ammonia ligase activity                   | 12        | 2           | 0.08     | 0.00262    |
|               | 16 GO:0016887       | ATPase activity                           | 402       | 6           | 2.59     | 0.00292    |
| 17 GO:0004707 | MAP kinase activity | 16                                        | 2         | 0.1         | 0.00469  |            |
| CC            | GO.ID               | Term                                      | Annotated | Significant | Expected | pva_wei    |
|               | 1 GO:0048046        | apoplast                                  | 71        | 4           | 0.46     | 0.0012     |
|               | 2 GO:0000151        | ubiquitin ligase complex                  | 87        | 4           | 0.56     | 0.0025     |

**Table S2. SSPs identified in our study.**

P, Plant; SC, suspension cell; M, Medium.

| Gene ID        | Strategy   | Sample | Annotation                                                                                |
|----------------|------------|--------|-------------------------------------------------------------------------------------------|
| LOC_Os06g21410 | RNA-seq    | SC     | arabinogalactan peptide 23 precursor, putative, expressed                                 |
| LOC_Os01g03310 | MS         | P      | BBT11 - Bowman-Birk type bran trypsin inhibitor precursor, expressed                      |
| LOC_Os01g04050 | RNA-seq    | SC/P   | BBT112 - Bowman-Birk type bran trypsin inhibitor precursor, expressed                     |
| LOC_Os01g03320 | RNA-seq    | P      | BBT12 - Bowman-Birk type bran trypsin inhibitor precursor, expressed                      |
| LOC_Os01g03390 | MS         | SC     | BBT17 - Bowman-Birk type bran trypsin inhibitor precursor, expressed                      |
| LOC_Os08g37930 | RNA-seq    | P      | beta-expansin precursor, putative, expressed                                              |
| LOC_Os01g17250 | MS         | M      | BRASSINOSTEROID INSENSITIVE 1-associated receptor kinase 1 precursor, putative, expressed |
| LOC_Os01g59440 | MS         | M      | BRASSINOSTEROID INSENSITIVE 1-associated receptor kinase 1 precursor, putative, expressed |
| LOC_Os03g32580 | MS         | M      | BRASSINOSTEROID INSENSITIVE 1-associated receptor kinase 1 precursor, putative, expressed |
| LOC_Os11g31530 | RNA-seq    | P      | BRASSINOSTEROID INSENSITIVE 1-associated receptor kinase 1 precursor, putative, expressed |
| LOC_Os02g02524 | RNA-seq    | P      | canopy homolog 2 precursor, putative, expressed                                           |
| LOC_Os10g41710 | RNA-seq/MS | SC/P   | chaperonin, putative, expressed                                                           |
| LOC_Os04g41620 | RNA-seq/MS | M/P    | CHIT2 - Chitinase family protein precursor, expressed                                     |
| LOC_Os12g07310 | RNA-seq    | SC/P   | citrate-binding protein precursor, putative, expressed                                    |
| LOC_Os06g13100 | MS         | SC/P   | CREG1 precursor, putative, expressed                                                      |
| LOC_Os05g19670 | MS         | SC/P   | Cupin domain containing protein, expressed                                                |
| LOC_Os03g48760 | MS         | M/P    | Cupin domain containing protein, expressed                                                |
| LOC_Os01g14670 | MS         | M/P    | Cupin domain containing protein, expressed                                                |
| LOC_Os03g48770 | MS         | M/P    | Cupin domain containing protein, expressed                                                |
| LOC_Os01g72300 | MS         | SC/M   | Cupin domain containing protein, expressed                                                |
| LOC_Os03g44880 | MS         | M      | Cupin domain containing protein, expressed                                                |
| LOC_Os08g09080 | RNA-seq    | SC/P   | Cupin domain containing protein, expressed                                                |
| LOC_Os08g09060 | RNA-seq    | SC/P   | Cupin domain containing protein, expressed                                                |
| LOC_Os03g58980 | RNA-seq    | SC/P   | Cupin domain containing protein, expressed                                                |
| LOC_Os08g08980 | RNA-seq    | SC     | cupin domain containing protein, expressed                                                |
| LOC_Os08g08970 | RNA-seq    | SC     | Cupin domain containing protein, expressed                                                |
| LOC_Os08g09020 | RNA-seq    | SC     | Cupin domain containing protein, expressed                                                |
| LOC_Os08g09000 | RNA-seq    | SC     | Cupin domain containing protein, expressed                                                |
| LOC_Os08g08990 | RNA-seq    | SC     | Cupin domain containing protein, expressed                                                |
| LOC_Os08g09040 | RNA-seq    | SC     | Cupin domain containing protein, expressed                                                |
| LOC_Os02g29000 | RNA-seq    | SC     | Cupin domain containing protein, expressed                                                |
| LOC_Os02g32980 | RNA-seq/MS | SC/P   | Cupin domain containing protein, expressed                                                |
| LOC_Os08g09010 | RNA-seq/MS | P/SC/M | Cupin domain containing protein, expressed                                                |
| LOC_Os12g05860 | RNA-seq/MS | SC/M   | Cupin domain containing protein, expressed                                                |
| LOC_Os12g05870 | RNA-seq/MS | SC/M   | Cupin domain containing protein, expressed                                                |
| LOC_Os12g05840 | RNA-seq/MS | SC/M   | Cupin domain containing protein, expressed                                                |
| LOC_Os08g13440 | RNA-seq/MS | P      | cupin domain containing protein, expressed                                                |
| LOC_Os03g31510 | RNA-seq/MS | SC/P   | cysteine proteinase inhibitor 8 precursor, putative, expressed                            |
| LOC_Os01g58890 | MS         | P      | cysteine proteinase inhibitor precursor protein, putative, expressed                      |
| LOC_Os04g28250 | MS         | SC/M   | cysteine proteinase inhibitor precursor, putative, expressed                              |
| LOC_Os09g08100 | RNA-seq    | SC     | cysteine proteinase inhibitor precursor, putative, expressed                              |
| LOC_Os03g19840 | RNA-seq    | SC     | cysteine-rich repeat secretory protein 55 precursor, putative, expressed                  |
| LOC_Os07g14150 | MS         | M      | cytidine deaminase, putative, expressed                                                   |
| LOC_Os08g29669 | MS         | SC     | cytochrome b5-like Heme/Steroid binding domain containing protein, expressed              |
| LOC_Os10g21790 | RNA-seq    | SC     | dehydration stress-induced protein, putative, expressed                                   |
| LOC_Os11g10870 | MS         | P      | dirigent, putative, expressed                                                             |
| LOC_Os11g07690 | RNA-seq    | SC     | dirigent, putative, expressed                                                             |
| LOC_Os07g44250 | RNA-seq    | P      | dirigent, putative, expressed                                                             |
| LOC_Os11g07670 | RNA-seq/MS | SC/M   | dirigent, putative, expressed                                                             |
| LOC_Os07g01660 | RNA-seq/MS | SC/M   | dirigent, putative, expressed                                                             |
| LOC_Os11g42550 | RNA-seq/MS | P      | dirigent, putative, expressed                                                             |
| LOC_Os02g30320 | RNA-seq    | SC     | drought-induced protein 1, putative, expressed                                            |
| LOC_Os04g36600 | RNA-seq    | SC/P   | DUF538 domain containing protein, putative, expressed                                     |
| LOC_Os01g14410 | RNA-seq    | P      | early light-induced protein, chloroplast precursor, putative, expressed                   |
| LOC_Os07g08150 | RNA-seq    | P      | early light-induced protein, chloroplast precursor, putative, expressed                   |
| LOC_Os07g08160 | RNA-seq    | P      | early light-induced protein, chloroplast precursor, putative, expressed                   |
| LOC_Os01g07780 | MS         | P      | embryo-specific 3, putative, expressed                                                    |
| LOC_Os06g10760 | MS         | SC     | emp24/gp25L/p24 family protein, putative, expressed                                       |
| LOC_Os03g13750 | MS         | SC     | erwinia induced protein 2, putative, expressed                                            |
| LOC_Os05g39990 | MS         | SC     | expansin precursor, putative, expressed                                                   |
| LOC_Os12g09620 | MS         | M/P    | expressed protein                                                                         |
| LOC_Os02g54680 | MS         | SC     | expressed protein                                                                         |
| LOC_Os07g29300 | MS         | M      | expressed protein                                                                         |
| LOC_Os06g09840 | MS         | SC     | expressed protein                                                                         |
| LOC_Os05g44160 | MS         | SC     | expressed protein                                                                         |
| LOC_Os05g07640 | MS         | SC     | expressed protein                                                                         |
| LOC_Os07g36410 | MS         | SC     | expressed protein                                                                         |
| LOC_Os03g07660 | MS         | M      | expressed protein                                                                         |
| LOC_Os11g25770 | MS         | M      | expressed protein                                                                         |
| LOC_Os07g09150 | MS         | M      | expressed protein                                                                         |
| LOC_Os03g48626 | MS         | P      | expressed protein                                                                         |
| LOC_Os03g39830 | MS         | P      | expressed protein                                                                         |
| LOC_Os03g48710 | MS         | P      | expressed protein                                                                         |
| LOC_Os02g12080 | RNA-seq    | SC/P   | expressed protein                                                                         |
| LOC_Os08g24200 | RNA-seq    | SC/P   | expressed protein                                                                         |
| LOC_Os02g12070 | RNA-seq    | SC/P   | expressed protein                                                                         |

|                |            |        |                                                                                             |
|----------------|------------|--------|---------------------------------------------------------------------------------------------|
| LOC_Os06g20820 | RNA-seq    | SC/P   | expressed protein                                                                           |
| LOC_Os03g41130 | RNA-seq    | SC     | expressed protein                                                                           |
| LOC_Os01g40290 | RNA-seq    | SC     | expressed protein                                                                           |
| LOC_Os02g31926 | RNA-seq    | SC     | expressed protein                                                                           |
| LOC_Os01g59970 | RNA-seq    | SC     | expressed protein                                                                           |
| LOC_Os04g28390 | RNA-seq    | SC     | expressed protein                                                                           |
| LOC_Os03g52420 | RNA-seq    | SC     | expressed protein                                                                           |
| LOC_Os08g05980 | RNA-seq    | SC     | expressed protein                                                                           |
| LOC_Os02g30190 | RNA-seq    | SC     | expressed protein                                                                           |
| LOC_Os11g13390 | RNA-seq    | SC     | expressed protein                                                                           |
| LOC_Os02g50390 | RNA-seq    | SC     | expressed protein                                                                           |
| LOC_Os02g12090 | RNA-seq    | SC     | expressed protein                                                                           |
| LOC_Os01g52060 | RNA-seq    | SC     | expressed protein                                                                           |
| LOC_Os08g24300 | RNA-seq    | SC     | expressed protein                                                                           |
| LOC_Os01g58340 | RNA-seq    | SC     | expressed protein                                                                           |
| LOC_Os01g40950 | RNA-seq    | SC     | expressed protein                                                                           |
| LOC_Os01g47290 | RNA-seq    | SC     | expressed protein                                                                           |
| LOC_Os02g12250 | RNA-seq    | SC     | expressed protein                                                                           |
| LOC_Os02g50374 | RNA-seq    | SC     | expressed protein                                                                           |
| LOC_Os12g12090 | RNA-seq    | P      | expressed protein                                                                           |
| LOC_Os02g12150 | RNA-seq    | P      | expressed protein                                                                           |
| LOC_Os06g39110 | RNA-seq    | P      | expressed protein                                                                           |
| LOC_Os09g10010 | RNA-seq    | P      | expressed protein                                                                           |
| LOC_Os03g40000 | RNA-seq    | P      | expressed protein                                                                           |
| LOC_Os07g38630 | RNA-seq    | P      | expressed protein                                                                           |
| LOC_Os04g29810 | RNA-seq    | P      | expressed protein                                                                           |
| LOC_Os03g44450 | RNA-seq    | P      | expressed protein                                                                           |
| LOC_Os01g10640 | RNA-seq    | P      | expressed protein                                                                           |
| LOC_Os10g07450 | RNA-seq    | P      | expressed protein                                                                           |
| LOC_Os10g34940 | RNA-seq    | P      | expressed protein                                                                           |
| LOC_Os12g11980 | RNA-seq    | P      | expressed protein                                                                           |
| LOC_Os08g30510 | RNA-seq    | P      | expressed protein                                                                           |
| LOC_Os11g13750 | RNA-seq/MS | M/P    | expressed protein                                                                           |
| LOC_Os08g16130 | RNA-seq    | P      | fiber protein Fb34, putative, expressed                                                     |
| LOC_Os03g55290 | RNA-seq/MS | SC/P   | GASR3 - Gibberellin-regulated GASA/GAST/Snakin family protein precursor, expressed          |
| LOC_Os06g15620 | MS         | SC/M   | GASR7 - Gibberellin-regulated GASA/GAST/Snakin family protein precursor, expressed          |
| LOC_Os03g47270 | MS         | SC     | GCRP4 - Glycine and cysteine rich family protein precursor, expressed                       |
| LOC_Os05g43690 | MS         | M      | glucan endo-1,3-beta-glucosidase-like protein 3 precursor, putative, expressed              |
| LOC_Os11g18170 | MS         | SC     | glutathione peroxidase, putative, expressed                                                 |
| LOC_Os06g21270 | RNA-seq    | P      | glycine rich protein family protein, putative, expressed                                    |
| LOC_Os06g21210 | RNA-seq    | P      | glycine rich protein family protein, putative, expressed                                    |
| LOC_Os10g31530 | RNA-seq    | SC     | glycine-rich cell wall protein, putative, expressed                                         |
| LOC_Os10g31680 | RNA-seq    | SC     | glycine-rich cell wall structural protein 2 precursor, putative, expressed                  |
| LOC_Os09g25720 | RNA-seq    | SC     | glycine-rich cell wall structural protein 2 precursor, putative, expressed                  |
| LOC_Os10g31540 | RNA-seq    | SC     | glycine-rich cell wall structural protein 2 precursor, putative, expressed                  |
| LOC_Os10g31660 | RNA-seq    | SC     | glycine-rich cell wall structural protein 2 precursor, putative, expressed                  |
| LOC_Os10g31720 | RNA-seq    | SC     | glycine-rich cell wall structural protein 2 precursor, putative, expressed                  |
| LOC_Os10g31710 | RNA-seq    | SC     | glycine-rich cell wall structural protein 2 precursor, putative, expressed                  |
| LOC_Os10g31640 | RNA-seq    | SC     | glycine-rich cell wall structural protein 2 precursor, putative, expressed                  |
| LOC_Os06g25010 | RNA-seq    | SC     | glycosyl hydrolase, putative, expressed                                                     |
| LOC_Os02g48980 | MS         | SC/M   | GPI-anchored protein, putative, expressed                                                   |
| LOC_Os05g09740 | MS         | P      | HAD superfamily phosphatase, putative, expressed                                            |
| LOC_Os10g41930 | RNA-seq    | SC     | haloacid dehalogenase-like hydrolase family protein, putative, expressed                    |
| LOC_Os03g27040 | MS         | P      | heavy metal-associated domain containing protein, expressed                                 |
| LOC_Os04g40410 | RNA-seq    | SC     | high affinity nitrate transporter, putative, expressed                                      |
| LOC_Os04g36750 | RNA-seq    | SC     | hsp20/alpha crystallin family protein, putative, expressed                                  |
| LOC_Os02g37200 | RNA-seq    | P      | hydrophobin, putative, expressed                                                            |
| LOC_Os02g50450 | RNA-seq    | SC     | hypothetical protein                                                                        |
| LOC_Os12g11550 | RNA-seq    | P      | hypothetical protein                                                                        |
| LOC_Os12g18560 | MS         | M      | invertase/pectin methylesterase inhibitor family protein, putative, expressed               |
| LOC_Os05g08920 | MS         | M      | late embryogenesis abundant protein, putative, expressed                                    |
| LOC_Os07g07920 | RNA-seq    | SC     | LTPL100 - Protease inhibitor/seed storage/LTP family protein precursor, expressed           |
| LOC_Os12g02310 | RNA-seq/MS | SC/P   | LTPL11 - Protease inhibitor/seed storage/LTP family protein precursor, expressed            |
| LOC_Os03g01300 | RNA-seq/MS | P      | LTPL114 - Protease inhibitor/seed storage/LTP family protein precursor, expressed           |
| LOC_Os03g01320 | RNA-seq    | P      | LTPL116 - Protease inhibitor/seed storage/LTP family protein precursor, expressed           |
| LOC_Os04g46820 | MS         | P      | LTPL121 - Protease inhibitor/seed storage/LTP family protein precursor, putative, expressed |
| LOC_Os04g46830 | MS         | P      | LTPL122 - Protease inhibitor/seed storage/LTP family protein precursor, expressed           |
| LOC_Os04g52260 | MS         | P      | LTPL124 - Protease inhibitor/seed storage/LTP family protein precursor, expressed           |
| LOC_Os05g47700 | RNA-seq    | P      | LTPL152 - Protease inhibitor/seed storage/LTP family protein precursor, expressed           |
| LOC_Os01g60740 | MS         | M      | LTPL16 - Protease inhibitor/seed storage/LTP family protein precursor, expressed            |
| LOC_Os05g40010 | MS         | P      | LTPL17 - Protease inhibitor/seed storage/LTP family protein precursor, expressed            |
| LOC_Os03g20760 | RNA-seq    | P      | LTPL66 - Protease inhibitor/seed storage/LTP family protein precursor, expressed            |
| LOC_Os11g02369 | RNA-seq/MS | P      | LTPL7 - Protease inhibitor/seed storage/LTP family protein precursor, expressed             |
| LOC_Os07g07790 | RNA-seq    | SC     | LTPL75 - Protease inhibitor/seed storage/LTP family protein precursor, expressed            |
| LOC_Os07g07930 | RNA-seq/MS | SC/M   | LTPL78 - Protease inhibitor/seed storage/LTP family protein precursor, expressed            |
| LOC_Os11g02400 | MS         | P/SC/M | LTPL8 - Protease inhibitor/seed storage/LTP family protein precursor, expressed             |
| LOC_Os06g49770 | MS         | M/P    | LTPL86 - Protease inhibitor/seed storage/LTP family protein precursor, expressed            |
| LOC_Os11g02424 | MS         | P      | LTPL9 - Protease inhibitor/seed storage/LTP family protein precursor, expressed             |
| LOC_Os11g34660 | RNA-seq    | P      | LTPL98 - Protease inhibitor/seed storage/LTP family protein precursor, expressed            |
| LOC_Os03g56944 | RNA-seq    | P      | lysine-rich arabinogalactan protein 19 precursor, putative, expressed                       |

|                |            |        |                                                                                                 |
|----------------|------------|--------|-------------------------------------------------------------------------------------------------|
| LOC_Os11g34570 | RNA-seq    | SC     | lysM domain-containing GPI-anchored protein precursor, putative, expressed                      |
| LOC_Os02g13660 | RNA-seq    | P      | meiosis 5, putative, expressed                                                                  |
| LOC_Os11g42970 | RNA-seq    | P      | membrane associated DUF588 domain containing protein, putative, expressed                       |
| LOC_Os03g57420 | MS         | SC/M   | ML domain protein, putative, expressed                                                          |
| LOC_Os03g06580 | RNA-seq    | SC     | MTN26L2 - MtN26 family protein precursor, expressed                                             |
| LOC_Os03g63740 | RNA-seq/MS | P      | NFD2, putative, expressed                                                                       |
| LOC_Os06g44910 | MS         | SC     | OsGrx_C4 - glutaredoxin subgroup I, expressed                                                   |
| LOC_Os03g17860 | MS         | SC     | OsPDIL5-1 protein disulfide isomerase PDIL5-1, expressed                                        |
| LOC_Os03g01020 | RNA-seq    | SC/P   | pectinesterase inhibitor domain containing protein, putative, expressed                         |
| LOC_Os09g32526 | MS         | SC     | peptidyl-prolyl cis-trans isomerase, FKBP-type, putative, expressed                             |
| LOC_Os06g49470 | MS         | P/SC/M | peptidyl-prolyl cis-trans isomerase, putative, expressed                                        |
| LOC_Os07g03200 | RNA-seq    | P      | phytosulfokines precursor, putative, expressed                                                  |
| LOC_Os03g52390 | RNA-seq    | P      | PIII1 - Proteinase inhibitor II family protein precursor, expressed                             |
| LOC_Os07g02200 | MS         | M/P    | plastocyanin-like domain containing protein, putative, expressed                                |
| LOC_Os03g57740 | MS         | M      | plastocyanin-like domain containing protein, putative, expressed                                |
| LOC_Os08g17160 | MS         | M      | plastocyanin-like domain containing protein, putative, expressed                                |
| LOC_Os04g46130 | MS         | P      | plastocyanin-like domain containing protein, putative, expressed                                |
| LOC_Os06g15600 | RNA-seq    | SC     | plastocyanin-like domain containing protein, putative, expressed                                |
| LOC_Os08g04340 | RNA-seq    | SC     | plastocyanin-like domain containing protein, putative, expressed                                |
| LOC_Os09g39940 | RNA-seq    | SC     | plastocyanin-like domain containing protein, putative, expressed                                |
| LOC_Os08g04370 | RNA-seq    | SC     | plastocyanin-like domain containing protein, putative, expressed                                |
| LOC_Os08g37670 | RNA-seq/MS | SC/M   | plastocyanin-like domain containing protein, putative, expressed                                |
| LOC_Os08g04350 | RNA-seq/MS | SC/M   | plastocyanin-like domain containing protein, putative, expressed                                |
| LOC_Os08g37660 | RNA-seq/MS | SC     | plastocyanin-like domain containing protein, putative, expressed                                |
| LOC_Os04g36770 | RNA-seq    | P      | PME/invertase inhibitor, putative, expressed                                                    |
| LOC_Os05g45480 | MS         | SC     | POEI45 - Pollen Ole e I allergen and extensin family protein precursor, expressed               |
| LOC_Os07g47750 | MS         | P      | POEI49 - Pollen Ole e I allergen and extensin family protein precursor, expressed               |
| LOC_Os05g45460 | MS         | SC/M   | POEI52 - Pollen Ole e I allergen and extensin family protein precursor, expressed               |
| LOC_Os02g21650 | MS         | SC     | prefoldin, putative, expressed                                                                  |
| LOC_Os11g02389 | RNA-seq/MS | P/SC/M | protease inhibitor/seed storage/LTP family, putative, expressed                                 |
| LOC_Os01g47420 | MS         | SC/P   | pterin-4-alpha-carbinolamine dehydratase, putative, expressed                                   |
| LOC_Os10g41980 | RNA-seq    | P      | RALFL26 - Rapid ALKalinization Factor RALF family protein precursor, expressed                  |
| LOC_Os12g38360 | RNA-seq    | P      | RALFL31 - Rapid ALKalinization Factor RALF family protein precursor, expressed                  |
| LOC_Os01g25540 | MS         | SC     | RALFL6 - Rapid ALKalinization Factor RALF family protein precursor, expressed                   |
| LOC_Os01g25560 | MS         | M      | RALFL7 - Rapid ALKalinization Factor RALF family protein precursor, expressed                   |
| LOC_Os02g44940 | MS         | M      | RALFL8 - Rapid ALKalinization Factor RALF family protein precursor, expressed                   |
| LOC_Os04g39440 | MS         | SC/P   | ras-related protein, putative, expressed                                                        |
| LOC_Os09g18310 | RNA-seq    | P      | retrotransposon protein, putative, unclassified                                                 |
| LOC_Os10g31730 | RNA-seq    | SC     | retrotransposon protein, putative, unclassified, expressed                                      |
| LOC_Os08g33710 | MS         | M/P    | ribonuclease T2 family domain containing protein, expressed                                     |
| LOC_Os07g43600 | RNA-seq    | SC     | ribonuclease T2 family domain containing protein, expressed                                     |
| LOC_Os01g47330 | MS         | P      | ribosomal protein L7/L12 C-terminal domain containing protein, expressed                        |
| LOC_Os09g06770 | RNA-seq    | SC     | RING finger protein, putative, expressed                                                        |
| LOC_Os04g29550 | RNA-seq    | SC/P   | RIPER2 - Ripening-related family protein precursor, expressed                                   |
| LOC_Os10g34840 | RNA-seq/MS | M/P    | RIPER6 - Ripening-related family protein precursor, expressed                                   |
| LOC_Os11g02150 | MS         | SC/M   | saposin-like type B, region 1 family protein, putative, expressed                               |
| LOC_Os10g11500 | RNA-seq    | SC     | SCP-like extracellular protein, expressed                                                       |
| LOC_Os07g03730 | RNA-seq    | P      | SCP-like extracellular protein, expressed                                                       |
| LOC_Os07g03710 | RNA-seq    | P      | SCP-like extracellular protein, expressed                                                       |
| LOC_Os01g28500 | RNA-seq    | P      | SCP-like extracellular protein, expressed                                                       |
| LOC_Os01g28450 | RNA-seq/MS | P      | SCP-like extracellular protein, expressed                                                       |
| LOC_Os06g43650 | MS         | SC     | secreted salivary protein, putative, expressed                                                  |
| LOC_Os10g34910 | RNA-seq    | SC     | secretory protein, putative, expressed                                                          |
| LOC_Os10g34930 | RNA-seq/MS | M/P    | secretory protein, putative, expressed                                                          |
| LOC_Os01g66960 | MS         | SC     | selenoprotein precursor, putative, expressed                                                    |
| LOC_Os09g19360 | RNA-seq    | SC     | senescence-induced receptor-like serine/threonine-protein kinase precursor, putative, expressed |
| LOC_Os05g16824 | RNA-seq    | SC     | SHR5-receptor-like kinase, putative, expressed                                                  |
| LOC_Os01g11230 | MS         | P      | SOUL heme-binding protein, putative, expressed                                                  |
| LOC_Os08g17680 | RNA-seq    | P      | stromal cell-derived factor 2-like protein precursor, putative, expressed                       |
| LOC_Os05g25850 | MS         | M/P    | superoxide dismutase, mitochondrial precursor, putative, expressed                              |
| LOC_Os12g38120 | MS         | P/SC/M | thaumatin family domain containing protein, expressed                                           |
| LOC_Os01g62260 | MS         | M      | thaumatin, putative, expressed                                                                  |
| LOC_Os12g43380 | MS         | P      | thaumatin, putative, expressed                                                                  |
| LOC_Os12g43440 | RNA-seq    | P      | thaumatin, putative, expressed                                                                  |
| LOC_Os12g43390 | RNA-seq    | P      | thaumatin, putative, expressed                                                                  |
| LOC_Os03g45960 | RNA-seq/MS | SC/M   | thaumatin, putative, expressed                                                                  |
| LOC_Os03g46070 | RNA-seq/MS | P      | thaumatin, putative, expressed                                                                  |
| LOC_Os03g08710 | MS         | SC     | THION26 - Plant thionin family protein precursor, expressed                                     |
| LOC_Os12g26960 | RNA-seq    | SC     | THION34 - Plant thionin family protein precursor, expressed                                     |
| LOC_Os06g45510 | MS         | M/P    | thioredoxin, putative, expressed                                                                |
| LOC_Os05g01262 | MS         | SC     | translocon-associated protein beta domain containing protein, expressed                         |
| LOC_Os01g01307 | MS         | P      | translocon-associated protein beta domain containing protein, expressed                         |
| LOC_Os02g53750 | RNA-seq    | SC     | tyrosine protein kinase domain containing protein, putative, expressed                          |
| LOC_Os04g30250 | RNA-seq    | P      | wall-associated receptor kinase-like 5 precursor, putative, expressed                           |
| LOC_Os11g37940 | MS         | M      | WIP2 - Wound-induced protein precursor, expressed                                               |
| LOC_Os11g37950 | RNA-seq    | P      | WIP3 - Wound-induced protein precursor, expressed                                               |
| LOC_Os11g37960 | RNA-seq/MS | P/SC/M | WIP4 - Wound-induced protein precursor, expressed                                               |
| LOC_Os11g37970 | RNA-seq    | SC/P   | WIP5 - Wound-induced protein precursor, expressed                                               |
| LOC_Os02g51710 | MS         | SC/P   | wound/stress protein, putative, expressed                                                       |
| LOC_Os07g48680 | RNA-seq    | P      | zinc finger, C3HC4 type domain containing protein, expressed                                    |

**Table S3. SSPs with post translational modifications identified by MS.**

| Gene ID        | Annotation                                                                                | Peptide sequences with post translational modifications identified by MS                 |
|----------------|-------------------------------------------------------------------------------------------|------------------------------------------------------------------------------------------|
| LOC_Os01g59440 | BRASSINOSTEROID INSENSITIVE 1-associated receptor kinase 1 precursor, putative, expressed | arabinosyl Hyp (P)--LTGPIPR                                                              |
| LOC_Os10g41710 | chaperonin, putative, expressed                                                           | SVGGVLLPKSAVK arabinosyl Hyp (P)                                                         |
| LOC_Os04g41620 | CHIT2 - Chitinase family protein precursor, expressed                                     | QWPCQPGKK arabinosyl Hyp (P)                                                             |
| LOC_Os03g44880 | Cupin domain containing protein, expressed                                                | DYAPWGLSPPHTHPR Oxidation (P)                                                            |
|                |                                                                                           | DYAPWGLSPPHTHPR Oxidation (P); Sulfo (STY)                                               |
|                |                                                                                           | ILATFAVVFLALAATSLAGDP Oxidation (P); Sulfo (STY)                                         |
|                |                                                                                           | DTLFGAAPPLPS Oxidation (P)                                                               |
|                |                                                                                           | GPLRLNGIPCK Oxidation (P)                                                                |
|                |                                                                                           | DYAPWGLSPPHTHPR Oxidation (P); Sulfo arabinosyl Hyp (P); Oxidation (P); Sulfo (STY)      |
| LOC_Os03g48760 | Cupin domain containing protein, expressed                                                | NSGNTSALAIAFNSQLPGTQSIADTLFGAAPPLPS arabinosyl Hyp (P); Oxidation (P); Sulfo (STY)       |
|                |                                                                                           | VTVNGHACKPASAAG Oxidation (P)                                                            |
|                |                                                                                           | TVNGHACKPASAAG Oxidation (P)                                                             |
|                |                                                                                           | DFAPGGTNPVHPRATEVGVILR Oxidation (P)                                                     |
| LOC_Os01g14670 | Cupin domain containing protein, expressed                                                | VPGLNTLGVSLAR Oxidation (P)                                                              |
|                |                                                                                           | DYAPGGLNPPHTHPR Oxidation (P); Sulfo (STY)                                               |
|                |                                                                                           | DKPAAVVSAFNSQLPGTQSIATLFAASPAVP arabinosyl Hyp (P); Oxidation (P); Sulfo (STY)           |
| LOC_Os03g48770 | Cupin domain containing protein, expressed                                                | GELLVGIIGTLDTGNR Sulfo (STY)                                                             |
|                |                                                                                           | DVAEWPVNTLGVSMNRV Oxidation (M)                                                          |
| LOC_Os01g72300 | Cupin domain containing protein, expressed                                                | IPGLNTLGVSMAR Oxidation (M)                                                              |
|                |                                                                                           | SVGEKPAVAISAFDSQLPGTQAAADALFGSSSPAAPTDLAR Oxidation (P)                                  |
| LOC_Os05g19670 | Cupin domain containing protein, expressed                                                | DVFVFPRLPGLNTLGVSMR Oxidation (M)                                                        |
|                |                                                                                           | ARPSLPCAVAVLLALLPTPSTAGDP Oxidation (P); Sulfo (STY)                                     |
|                |                                                                                           | ARPSLPCAVAVLLALLPTPSTAG arabinosyl Hyp (P); Oxidation (P); Sulfo (STY)                   |
|                |                                                                                           | LPGLNLTGVMSRI Oxidation (P)                                                              |
| LOC_Os02g32980 | Cupin domain containing protein, expressed                                                | IPATVFGSGIREAVLER arabinosyl Hyp (P)                                                     |
| LOC_Os08g09010 | Cupin domain containing protein, expressed                                                | AAMLDTPR Oxidation (P)                                                                   |
|                |                                                                                           | VGSNVTLINVMQIPGLNTLGISIARIDYAPLGENPPHTHPR arabinosyl Hyp (P); Oxidation (M); Sulfo (STY) |
| LOC_Os12g05870 | Cupin domain containing protein, expressed                                                | MASSNFLLIPLIALVTTQAMASDPSPLQDLQVADKNSPVR Oxidation (M); Oxidation (P); Sulfo (STY)       |
| LOC_Os12g05840 | Cupin domain containing protein, expressed                                                | LTGLNTLGISMARI Oxidation (M)                                                             |
|                |                                                                                           | GQNPPHTHPR/LAGLNLTLSISMAR Oxidation (M)                                                  |
|                |                                                                                           | ENKLFTK Sulfo (STY)                                                                      |
|                |                                                                                           | AGSNVTLINVMK Oxidation (M); Sulfo (STY)                                                  |
| LOC_Os08g13440 | cupin domain containing protein, expressed                                                | FDMPR Oxidation (M); Oxidation (P)                                                       |
| LOC_Os01g58890 | cysteine proteinase inhibitor precursor protein, putative, expressed                      | VWEKPWMDFK arabinosyl Hyp (P); Oxidation (M)                                             |
|                |                                                                                           | VWEKPWMDFK Oxidation (M)                                                                 |
| LOC_Os04g28250 | cysteine proteinase inhibitor precursor, putative, expressed                              | QVSGVAYYLKVAASAR Sulfo (STY)                                                             |
|                |                                                                                           | VAASARDPR Oxidation (P)                                                                  |
| LOC_Os08g29669 | cytochrome b5-like Heme/Steroid binding domain containing protein, expressed              | AAEASIVNRGHDIMVR Oxidation (M)                                                           |
|                |                                                                                           | MGSTRLLVLLAAASLLLATAVPAAR Oxidation (P); Sulfo (STY)                                     |
| LOC_Os11g10870 | dirigent, putative, expressed                                                             | GVAALPGDAVNR arabinosyl Hyp (P)                                                          |
| LOC_Os01g07780 | embryo-specific 3, putative, expressed                                                    | RRPPPQR arabinosyl Hyp (P)                                                               |
| LOC_Os06g10760 | emp24/gp25L/p24 family protein, putative, expressed                                       | MAAVAAAMVVVALLGGGAVEAVWLDLPPTGTK arabinosyl Hyp (P); Sulfo (STY)                         |
| LOC_Os05g39990 | expansin precursor, putative, expressed                                                   | AGIVPVSR Oxidation (P)                                                                   |
| LOC_Os07g29300 | expressed protein                                                                         | DGAPGQAATGREK arabinosyl Hyp (P)                                                         |
|                |                                                                                           | SISLPISPLFIPLHPLLSLLSQAQ Oxidation (P); Sulfo (STY)                                      |
|                |                                                                                           | QLPISLPLVATPSPLAAGSRPSFRHPSRPPR arabinosyl Hyp (P); Oxidation (P); Sulfo (STY)           |
|                |                                                                                           | GTPMSFSPLIR Oxidation (M); Oxidation (P)                                                 |
|                |                                                                                           | DDLGGTLPASVTAITSSIHR arabinosyl Hyp (P)                                                  |
|                |                                                                                           | QLPISLPLVATPSPLAAGSRPSFR arabinosyl Hyp (P); Oxidation (P); Sulfo (STY)                  |
|                |                                                                                           | RSSHPPR Oxidation (P)                                                                    |
| LOC_Os11g25770 | expressed protein                                                                         | MARPLHR Oxidation (M); Oxidation (P)                                                     |
|                |                                                                                           | MARPLHRLWR arabinosyl Hyp (P); Oxidation (M)                                             |
| LOC_Os07g09150 | expressed protein                                                                         | DPPPPSPTWPER Oxidation (P)                                                               |
|                |                                                                                           | MPPPPPLLLAAAVLASAAAALA Oxidation (P); Sulfo (STY)                                        |
|                |                                                                                           | DWPGGR Oxidation (P)                                                                     |
|                |                                                                                           | MPPPPPLLLAAAVLASAAAALADPPPPSPTWPER arabinosyl Hyp (P); Oxidation (M); Sulfo (STY)        |

|                |                                                                                             |                                                                                                 |
|----------------|---------------------------------------------------------------------------------------------|-------------------------------------------------------------------------------------------------|
| LOC_Os03g48626 | expressed protein                                                                           | DPPPPSPTPWPER arabinosyl Hyp (P); Oxidation (P); Sulfo (STY)                                    |
| LOC_Os03g48710 | expressed protein                                                                           | FFVWSITTIVAHP Sulfo (STY)                                                                       |
|                |                                                                                             | PPPLLLLLLLLLLGGAAAAEPPAAPSSSPPHK Oxidation (P)                                                  |
|                |                                                                                             | MPPPLLLLLLLLLLGGAAAAEPPAAPSSSPPHK arabinosyl Hyp (P); Oxidation (M); Oxidation (P); Sulfo (STY) |
|                |                                                                                             | PPPLLLLLLLLLLGGAAAAEPPAAPSSSPPHK arabinosyl Hyp (P); Oxidation (P); Sulfo (STY)                 |
| LOC_Os02g54680 | expressed protein                                                                           | LGGHGAPAFSR arabinosyl Hyp (P)                                                                  |
|                |                                                                                             | KGGSTMPPLLVK Oxidation (M); Oxidation (P); Sulfo (STY)                                          |
|                |                                                                                             | ELNVAQLGAGVRQATCDVATWEK Sulfo (STY)                                                             |
| LOC_Os06g09840 | expressed protein                                                                           | MSLAATFVFLLVSLQMLDQVLDLVK Oxidation (M); Sulfo (STY)                                            |
| LOC_Os05g07640 | expressed protein                                                                           | HCPSFAVNHEVMMPIPKPTGFTGADPYK arabinosyl Hyp (P); Oxidation (M); Oxidation (P); Sulfo (STY)      |
|                |                                                                                             | HCPSFAVNHEVMMPIPKPTGFTGADPYK Oxidation (M); Oxidation (P)                                       |
| LOC_Os06g15620 | GASR7 - Gibberellin-regulated GASA/GAST/Snakin family protein precursor, expressed          | RAMASAATPQSPSPK Oxidation (M); Oxidation (P)                                                    |
|                |                                                                                             | RAMASAATPQSPSPK arabinosyl Hyp (P); Oxidation (M)                                               |
| LOC_Os03g47270 | GCRP4 - Glycine and cysteine rich family protein precursor, expressed                       | KQPAGR Oxidation (P)                                                                            |
|                |                                                                                             | DLMSAAPSAK Oxidation (M); Oxidation (P)                                                         |
|                |                                                                                             | QLPVAPDDELPR Oxidation (P)                                                                      |
|                |                                                                                             | IPPCRLADLALPLLR arabinosyl Hyp (P); Oxidation (P)                                               |
|                |                                                                                             | DCTQIMQSGACYQPSTIVAHCSYATNSYFQK arabinosyl Hyp (P)                                              |
| LOC_Os05g43690 | glucan endo-1,3-beta-glucosidase-like protein 3 precursor, putative, expressed              | YAPTTSPK Oxidation (P)                                                                          |
| LOC_Os11g18170 | glutathione peroxidase, putative, expressed                                                 | MEAAAATR Oxidation (M)                                                                          |
| LOC_Os03g27040 | heavy metal-associated domain containing protein, expressed                                 | MEAAAATRLSFVPLAAARLLAGFMRPR/Oxidation (M); Oxidation (P); Sulfo (STY)                           |
|                |                                                                                             | VPPASVPPPPPPAPAALVR arabinosyl Hyp (P); Oxidation (P); Sulfo (STY)                              |
|                |                                                                                             | RVPPASVPPPPPPAPAALVR arabinosyl Hyp (P); Oxidation (P); Sulfo (STY)                             |
| LOC_Os12g18560 | invertase/pectin methylesterase inhibitor family protein, putative, expressed               | ASIALFLAVNLVVFSLGSACGGHCPTPTPTPTPAAFGK arabinosyl Hyp (P); Oxidation (P); Sulfo (STY)           |
|                |                                                                                             | CPRDALK Oxidation (P)                                                                           |
| LOC_Os04g46820 | LTPL121 - Protease inhibitor/seed storage/LTP family protein precursor, putative, expressed | CPTPPPPALPPPPPTPTPSYHNK arabinosyl Hyp (P); Oxidation (P)                                       |
| LOC_Os04g46830 | LTPL122 - Protease inhibitor/seed storage/LTP family protein precursor, expressed           | MVPAARSGWPAAAAVLVVLVSSPGTSTVVVAR arabinosyl Hyp (P); Oxidation (M); Oxidation (P); Sulfo (STY)  |
| LOC_Os05g40010 | LTPL17 - Protease inhibitor/seed storage/LTP family protein precursor, expressed            | ATPATPVGSGVAPLR Oxidation (P)                                                                   |
| LOC_Os07g07930 | LTPL78 - Protease inhibitor/seed storage/LTP family protein precursor, expressed            | VQTPPVSNCKSGAAAPPAGQPTTTPAGTGSK arabinosyl Hyp (P); Oxidation (P)                               |
|                |                                                                                             | TRALGLPDACK Oxidation (P)                                                                       |
|                |                                                                                             | SGAAAPPAGQPTTTPAGTGSKATPATPVGSGVAPLR arabinosyl Hyp (P); 4 Oxidation (P)                        |
| LOC_Os03g63740 | NFD2, putative, expressed                                                                   | VAAGTKPTAPPVCGALR/VGIPSVRVAAGTKPTAPPVCGALR Oxidation (P); Sulfo (STY)                           |
|                |                                                                                             | MGMAHVLSLLVILVAIPSSRSHALPSSSPFDAALATLQNIAYR Oxidation (M); Oxidation (P); Sulfo (STY)           |
|                |                                                                                             | VGIPSVR arabinosyl Hyp (P)                                                                      |
| LOC_Os03g57740 | plastocyanin-like domain containing protein, putative, expressed                            | ITVIAAGAPAGASEAPPPSSAAGK Oxidation (P); Sulfo (STY)                                             |
|                |                                                                                             | LKITVIAAGAPAGASEAPPPSSAAGK-arabinosyl Hyp (P); Oxidation (P); Sulfo (STY)                       |
| LOC_Os08g04350 | plastocyanin-like domain containing protein, putative, expressed                            | VAVKVEAATGSNPTPSPLAPLR arabinosyl Hyp (P); Oxidation (P)                                        |
|                |                                                                                             | TPTVMAPNAMPTNGRPTPPSSASKPVGVALVGLSLSAIVAGLMVF Oxidation (M); Oxidation (P); Sulfo (STY)         |
|                |                                                                                             | VYVPRSPSR Oxidation (P)                                                                         |
| LOC_Os05g45480 | POEI45 - Pollen Ole e l allergen and extensin family protein precursor, expressed           | LVVDTPLIKDANLPAAGLSVSYLQGPLTR arabinosyl Hyp (P); Oxidation (P)                                 |
| LOC_Os07g47750 | POEI49 - Pollen Ole e l allergen and extensin family protein precursor, expressed           | VASLPK Oxidation (P)                                                                            |
| LOC_Os05g45460 | POEI52 - Pollen Ole e l allergen and extensin family protein precursor, expressed           | TRGVAMAHAR Oxidation (M)                                                                        |
| LOC_Os01g47420 | pterin-4-alpha-carbinolamine dehydratase, putative, expressed                               | YYAMAAPSWPTVSKNPLLLGHGR arabinosyl Hyp (P); Oxidation (M); Oxidation (P)                        |
|                |                                                                                             | IPVTLLR Oxidation (P); Sulfo (STY)                                                              |
| LOC_Os11g02150 | saposin-like type B, region 1 family protein, putative, expressed                           | MVLQYVPLVLVNGEK Oxidation (M)                                                                   |
|                |                                                                                             | EVSKLAIALAMVAAMALPSQAQNSPQDYVR arabinosyl Hyp (P); 2 Oxidation (M); Sulfo (STY)                 |
| LOC_Os01g28450 | SCP-like extracellular protein, expressed                                                   | REPFSIMSLK Oxidation (M)                                                                        |
| LOC_Os06g43650 | secreted salivary protein, putative, expressed                                              | REPFSIMSLK Oxidation (P)                                                                        |
|                |                                                                                             | DAASAIKGFGLPAK Oxidation (P)                                                                    |
|                |                                                                                             | EPFSIMSLK Oxidation (M)                                                                         |
| LOC_Os05g25850 | superoxide dismutase, mitochondrial precursor, putative, expressed                          | HHATYVANYNK/GVTTVALPDLPY arabinosyl Hyp (P)                                                     |
|                |                                                                                             | GVTTVALPDLPY arabinosyl Hyp (P)                                                                 |
| LOC_Os12g38120 | thaumatin family domain containing protein, expressed                                       | SPGELKVICPPTMLTAAAAAASDMLIR Oxidation (M); Oxidation (P); Sulfo (STY)                           |
| LOC_Os03g46070 | thaumatin, putative, expressed                                                              | AAPAILR Oxidation (P)                                                                           |
| LOC_Os01g01307 | translocon-associated protein beta domain containing protein, expressed                     | FQGSFAVITYRVPTK Oxidation (P); Sulfo (STY)                                                      |
| LOC_Os02g51710 | wound/stress protein, putative, expressed                                                   | RDLLPTR Sulfo (STY)                                                                             |
|                |                                                                                             | DAAPYKLEAIR Oxidation (P)                                                                       |



**Table S4. Primer list**

|             |                          |
|-------------|--------------------------|
| PSKF        | CAACGCCTACGACGTCTCTC     |
| PSKR        | AGATGTAATCGGTGTGCGCC     |
| UbiF        | AACCAGCTGAGGCCCAAGA      |
| UbiR        | ACGATTGATTTAACCAGTCCATGA |
| PAL1F       | TGAATAACAGTGGAGTGTGGAG   |
| PAL1R       | AACCTGCCACTCGTACCAAG     |
| Chitinase1F | GCACTGATAACCACTGATCGG    |
| Chitinase1R | TGTGGGCATTACTGATGATTG    |
| Pbz1F:      | CATGAAGCTTAACCCTGCCG     |
| Pbz1R:      | CCTCGAGCACATCCGACTTT     |
| IRPqF       | AGGACGATGAAGGGGGAAG      |
| IRPqR       | TAGCAGCAGTGTGTGGGAGA     |
| RALFL8F     | CAGGAATCGAATCGAGTGAA     |
| RALFL8R     | TCACCGGGTTGTCATCAGTA     |
| RALFL6F     | GCTCAAACCGGGATTATTCA     |
| RALFL6R     | CACGGTTAAAACAGCGACAA     |
| RALFL7F     | CCACCACCAAACTGTTGAA      |
| RALFL7R     | TTTAGATTAGCGGGCACCAA     |
| IRPOF       | CACCATATATCAATGGCGATGAC  |
| IRPOR       | GCAGCAGTGTGTGGGAGAGTTG   |
